# Supplementary material for: Compartment-specific opioid receptor signaling is selectively modulated by different dynorphin peptides
Source: eLife. 2021 Apr 28;10:e60270. doi: 10.7554/eLife.60270 (PMC8112862; doi:10.7554/eLife.60270)
Supplement: Source data 1. [file elife-60270-data1.xlsx]

## Sheet: Sheet1
		Mean	SD	SEM	p value	n											Control	PHOS	ECE2 in	Control	PHOS	ECE2 in
Figure 1B	alpha-neo	74.7893	9.6961	4.84805	>0.9999	4											92.6406	95.629	58.4399	87.9827	35.0206	38.6591
	Dyn A	64.9009	26.2374	7.57409	0.5768	12											87.1912	66.9403	54.0512	102.06	36.7784	21.2625
	Dyn B	74.5192	17.3319	5.00328	--	12											132.818	111.053	57.3774	60.75	51.03	25.515
	Dyn A8	75.1917	9.04112	2.60995	0.9997	12											91.4712	79.6908		107.73	68.8499	35.0206
																	88.7984	51.4925		108.245	34.7931	26.0357
Figure 1D	alpha-neo	64.488	4.23245	1.27613	0.4177	11											76.5032	84.3785		89.8641	51.9749	25.0147
	Dyn A	67.4856	9.13694	2.88936	0.907	10											125.053	62.7565		123.709	47.7109
	Dyn B	69.7076	4.76503	1.50683	--	10											92.7312	26.0806		145.8	48.6
	Dyn A8	67.6144	9.93413	3.14145	0.9207	10											116.418	68.3064		73.8592
																	59.4451
Figure 2D	alpha-neo	0.05959	0.0278815	0.00745166	0.0066	14											104.323
	Dyn A	0.04929	0.0231698	0.00371013	<0.0001	39											86.0661
	Dyn B	0.1135	0.077562	0.0107559	--	52											121.13
	Dyn A8	0.04757	0.0271423	0.00472487	<0.0001	33											95.629
																	129.782
Figure 2G	Dyn A	0.2562	0.117324	0.0204234	0.0024	33
	Dyn B	0.6418	0.205856	0.0375839	0.0024	30
Figure 2J	Dyn A 30 min	1.21249	0.222671	0.0995817	0.9241	5
	Dyn B 30 min	0.645143	0.501094	0.224096	0.9241	5
	Dyn A 120 min	1.42678	0.198139	0.0886106	0.0086	5
	Dyn B 120 min	1.49879	0.392641	0.175594	0.0086	5
Figure 2 Figure Supplement 1A	Dyn A	0.0178113	0.00520313	0.00173438	0.0004	9
	Dyn B	0.0426204	0.0147576	0.00602475	0.0004	6
Figure 2 Figure Supplement 1B	Control Dyn A	100	21.0539	5.43609	--	15
	PHOS Dyn A	71.8142	24.8731	8.29103	0.0034	9
	ECE2 in Dyn A	56.6228	2.28962	1.32191	0.0026	3
	Control Dyn B	100	25.6486	8.54952	--	9
	PHOS Dyn B	46.8447	11.4535	4.04943	<0.0001	8
	ECE2 in Dyn B	28.5846	6.71109	2.73979	<0.0001	6
Figure 3B	Dyn A: APPL1	20.1688	10.1494	3.58837	--	8
	Dyn A: EEA1	24.462	7.16272	2.26505	--	10
	Dyn A: Rab5	19.4019	5.44326	1.81442	--	9
	Dyn A: Rab11	15.461	4.68084	1.41133	--	11
	Dyn A: Rab7	44.6356	8.11323	1.81417	--	20
	Dyn A: Lamp1	33.0375	13.9882	3.39265	--	17
Figure 3C	Dyn B: APPL1	9.67135	6.12361	1.44335	--	18
	Dyn B: EEA1	24.1219	8.6533	2.16333	--	16
	Dyn B: Rab5	21.69	6.11326	1.57844	--	15
	Dyn B: Rab11	31.5184	7.42261	1.74953	--	18
	Dyn B: Rab7	21.7371	8.50562	1.77354	--	23
	Dyn B: Lamp1	14.381	6.0049	1.11508	--	29
Figure 3F	Dyn A	0.287687	0.135693	0.00850959	<0.0001	766
	Dyn B	0.135693	0.0814415	0.00287939	<0.0001	800
Figure 3G	Dyn A	61.7167	15.2811	4.60743	0.0002	11
	Dyn B	39.9849	8.75659	2.3403	0.0002	14
Figure 3I	- Lyso - Nb39	23.3558	8.08226	2.55584	--	10
	- Lyso + Nb39	38.416	17.3826	5.49685	--	10
	+ Lyso - Nb39	23.6543	11.3675	3.59472	--	10
	+ Lyso + Nb39	14.5739	5.08066	1.60665	--	10
Figure 3J	control	100	18.1936	5.25205	--	12
	Dyn A	64.9009	26.2374	7.57409	--	12
	Washout	44.2544	13.0916	3.77921	--	12
	Rechallenge	33.9134	8.10783	2.34053	--	12
	Dyn B	74.5192	17.3319	5.00328	--	12
	Washout	92.2399	21.6377	6.24627	--	12
	Rechallenge	66.1161	17.7838	5.13375	--	12
Figure 3 Figure Supplement 1E	Dyn A	50.3894	13.8621	4.38357	0.0003	10
	Dyn B	29.3064	7.05448	2.12701	0.0003	11
Figure 3 Figure Supplement 1H	Dyn A	17.4965	4.77999	1.59333	0.002	9
	Dyn B	31.0243	10.1427	3.2074	0.002	10
Figure 4A	Dyn A	6	2.61861	0.92582	0.0006	8
	Dyn B	20	8.26352	2.92159	0.0006	8
Figure 4B	Dyn A	33.7868	9.61826	3.92664	0.0023	6
	Dyn B	11.383	7.325	2.76859	0.0023	7
Figure 4C	Dyn A	16.2698	5.26448	2.35435	0.003	5
	Dyn B	33.5029	10.0566	3.03217	0.003	11
Figure 4E	Dyn A	28.4835	9.79931	3.09881	0.0007	10
	Dyn B	13.0266	9.92584	3.13883	0.0007	10
Figure 4 Figure Supplement 1B	Dyn A 5 min	1.37392	0.234055	0.0884645	0.6659	7												#DIV/0!	#DIV/0!	#DIV/0!
	Dyn B 5 min	1.1526	0.560153	0.211718	0.6659	7												#DIV/0!	#DIV/0!	#DIV/0!
	Dyn A 20 min	1.17887	0.544224	0.243384	0.9753	5
	Dyn B 20 min	1.11466	0.61847	0.276588	0.9753	5
																		#DIV/0!	#DIV/0!	#DIV/0!
																		#DIV/0!	#DIV/0!	#DIV/0!
